# Supplementary material
Source: Research Square preprint supplement (doi:10.21203/rs.3.rs-8743399/v1)
Supplement: Supplementary file 1 [file d54c081f118f7b948de8f748.docx]

| **CLINICAL**  **FEATURES** | Sex (‘**sexe**'), Performans Status ('**OMS**'), Age ('**age**'), BMI (**'BMI**'), Weight ('**poids**'), Height ('**taille**'), Dyspnea Scale according to mMRC ('**dyspnee_NYHA**'), Charlson Comorbidity Index ('**score_charlson**'),  Leukemia ('**score_leucemie**'), Lymphoma ('**score_lymphome**’), Myocardial Infarction ('**score_IDM**'), Localised solid tumor ('**score_kc_loca**l'), Metastatic solid tumor ('**score_kc_meta**'), Moderate-Severe CKD ('**score_IRC**'), Uncomplicated Diabetes ('**score_diabete**'), End-organ damage Diabetes ('**score_diabete_comp**'), Mild liver disease ('**score_hepatique_mod**'), Moderate-severe liver disease ('**score_hepatique_HTP**'), Peptic ulcer disease ('**score_ulcere**'), Peripheral vascular disease ('**score_vasc_periph**'), Connective tissue disease ('**score_systeme**'), Chronic pulmonary disease ('**score_systeme**'), Congestive heart failure ('**score_ICC**'), Dementia ('**score_demence**'), CVA or TIA ('**score_AIT_AVC**'), Patient age group over 50 years ('**score_age_50**'), Hypertension ('**HTA**'), Aids ('**score_sida**'), Active smoking ('**tabac**'),  Smoking cessation ('**tabac_sevre**'), Number of pack-years ('**tabac_PA**'), Histology ('**histo**'), Sleep Apnea Syndrome ('**SAS**'), Clinical Tumor Stage ('**T**'), Clinical Nodal Stage ('**N**'), Clinical Metastatic Stage ('**M**'), Central location **1** ('**centrale**'), Pulmonary lobe localisation ('**loc'**), Number of treated tumor by patient ('**nbre_cibles**'), History of other primary pulmonary tumor ('**ATCD_neo_pulm**'), History of other primary tumor ('**ATCD_neo_NP**'), Localisation 1 of  the primary tumor history ('**ATCD_loc_1**') , Localisation 2 of  the primary tumor history ('**ATCD_loc_2**'), Localisation 3 of  the primary tumor history ('**ATCD_loc_3**') |
| --- | --- |
| **DOSIMETRIC FEATURES** | Total dose ('**dose_to**t'), BED10 ('**BED_10**'), Dose per fraction ('**dose_fraction**'), Overall duration of treatment ('**etalement**'), GTV Volume ('**vol_GTV**'), ITV Volume ('**vol_ITV**'), PTV volume **2** ('**vol_PTV**'), Minimum dose in PTV ('**min_PTV**'), Mean dose in PTV ('**mean_PTV**'), Maximum dose in PTV ('**max_PTV**'), PTV coverage **3** ('**couv_PTV**') |
| **RADIOMICS FEATURES**  *SHAPE RADIOMICS*  *TEXTURAL RADIOMICS* | **'MORPHOLOGICAL_Volume', 'MORPHOLOGICAL_ApproximateVolume',**  **'MORPHOLOGICAL_SurfaceArea', 'MORPHOLOGICAL_SurfaceToVolumeRatio', 'MORPHOLOGICAL_Compacity', 'MORPHOLOGICAL_voxelsCounting',**  **'MORPHOLOGICAL_Compactness1', 'MORPHOLOGICAL_Asphericity',**  **'MORPHOLOGICAL_Compactness2', 'MORPHOLOGICAL_SphericalDisproportion',**  **'MORPHOLOGICAL_Sphericity', 'MORPHOLOGICAL_CentreOfMassShift', 'MORPHOLOGICAL_Maximum3DDiameter', 'MORPHOLOGICAL_SphereDiameter', 'MORPHOLOGICAL_IntegratedIntensity'** |
| **'GLCM_JointMaximum', 'GLCM_JointAverage', 'GLCM_JointVariance', 'GLCM_JointEntropyLog2', 'GLCM_JointEntropyLog10', 'GLCM_DifferenceAverage', 'GLCM_DifferenceVariance', 'GLCM_SumAverage', 'GLCM_SumVariance', 'GLCM_AngularSecondMoment', 'GLCM_Contrast', 'GLCM_Dissimilarity', 'GLCM_InverseDifference', 'GLCM_NormalisedInverseDifference', 'GLCM_InverseDifferenceMoment', 'GLCM_NormalisedInverseDifferenceMoment', 'GLCM_InverseVariance', 'GLCM_Correlation', 'GLCM_Autocorrelation', 'GLCM_ClusterTendency', 'GLCM_ClusterShade', 'GLCM_ClusterProminence', 'GLRLM_ShortRunsEmphasis', 'GLRLM_LongRunsEmphasis', 'GLRLM_LowGreyLevelRunEmphasis', 'GLRLM_HighGreyLevelRunEmphasis', 'GLRLM_ShortRunLowGreyLevelEmphasis', 'GLRLM_ShortRunHighGreyLevelEmphasis', 'GLRLM_LongRunLowGreyLevelEmphasis', 'GLRLM_LongRunHighGreyLevelEmphasis', 'GLRLM_GreyLevelNonUniformity', 'GLRLM_RunLengthNonUniformity',  'GLRLM_RunPercentage', 'NGTDM_Coarseness', 'NGTDM_Contrast', 'NGTDM_Busyness', 'NGTDM_Complexity', 'NGTDM_Strength',  'GLSZM_SmallZoneEmphasis', 'GLSZM_LargeZoneEmphasis', 'GLSZM_GreyLevelNonUniformity',**  **'GLSZM_LowGrayLevelZoneEmphasis', 'GLSZM_HighGrayLevelZoneEmphasis', 'GLSZM_SmallZoneLowGreyLevelEmphasis', 'GLSZM_SmallZoneHighGreyLevelEmphasis', 'GLSZM_LargeZoneLowGreyLevelEmphasis', 'GLSZM_LargeZoneHighGreyLevelEmphasis', 'GLSZM_NormalisedGreyLevelNonUniformity', 'GLSZM_ZoneSizeNonUniformity', 'GLSZM_GreyLevelVariance', 'GLSZM_NormalisedZoneSizeNonUniformity',  'GLSZM_ZonePercentage', 'GLSZM_ZoneSizeVariance', 'GLSZM_ZoneSizeEntropy'** |

**Supplementary Table S1.** List of clinical, dosimetric, shape and textural radiomics features used in this study. BMI = Body Masse Index. mMRC = modified Medical Research Council. CKD = Chronic Kidney Disease. CVA = Cerebrovascular Accident. TIA = Transient Ischemic Attack. BED10 = Biologically Effective Dose for 𝞪/𝛃=10). GTV = Gross Tumor Volume. ITV = Internal Target Volume. PTV = Planning Target Volume. **1** According to the Timmerman et al. Classification (38). **2**PTV corresponded to an isometric margin of 3 to 5 mm around the GTV or ITV. **3** PTV covered by 95% of the prescription dose.

| **RADIOMICS FEATURES**  *INTENSITY RADIOMICS* | **'INTENSITY-BASED_MeanIntensity', 'INTENSITY-BASED_IntensitySkewness', 'INTENSITY-BASED_IntensityKurtosis', 'INTENSITY-BASED_MedianIntensity', 'INTENSITY-BASED_MinimumIntensity', 'INTENSITY-BASED_10thIntensityPercentile', 'INTENSITY-BASED_25thIntensityPercentile', 'INTENSITY-BASED_50thIntensityPercentile', 'INTENSITY-BASED_75thIntensityPercentile', 'INTENSITY-BASED_90thIntensityPercentile', 'INTENSITY-BASED_StandardDeviation', 'INTENSITY-BASED_MaximumIntensity', 'INTENSITY-BASED_IntensityInterquartileRange', 'INTENSITY-BASED_IntensityRange', 'INTENSITY-BASED_IntensityBasedMeanAbsoluteDeviation', 'INTENSITY-BASED_IntensityBasedRobustMeanAbsoluteDeviation', 'INTENSITY-BASED_IntensityBasedMedianAbsoluteDeviation', 'INTENSITY-BASED_AreaUnderCurveCIVH', 'INTENSITY-BASED_IntensityBasedEnergy', 'INTENSITY-BASED_RootMeanSquareIntensity', 'INTENSITY-BASED_TotalLesionGlycolysis', 'LOCAL_INTENSITY_BASED_GlobalIntensityPeak', 'LOCAL_INTENSITY_BASED_LocalIntensityPeak',**  **'INTENSITY-HISTOGRAM_IntensityHistogramMean', 'INTENSITY-HISTOGRAM_IntensityHistogramVariance', 'INTENSITY-HISTOGRAM_IntensityHistogramSkewness', 'INTENSITY-HISTOGRAM_IntensityHistogramKurtosis', 'INTENSITY-HISTOGRAM_IntensityHistogramMedian', 'INTENSITY-HISTOGRAM_IntensityHistogramMinimumGreyLevel', 'INTENSITY-HISTOGRAM_IntensityHistogram10thPercentile', 'INTENSITY-HISTOGRAM_IntensityHistogram25thPercentile', 'INTENSITY-HISTOGRAM_IntensityHistogram50thPercentile', 'INTENSITY-HISTOGRAM_IntensityHistogram75thPercentile', 'INTENSITY-HISTOGRAM_IntensityHistogram90thPercentile', 'INTENSITY-HISTOGRAM_IntensityHistogramStd', 'INTENSITY-HISTOGRAM_IntensityHistogramMaximumGreyLevel', 'INTENSITY-HISTOGRAM_IntensityHistogramMode', 'INTENSITY-HISTOGRAM_IntensityHistogramInterquartileRange', 'INTENSITY-HISTOGRAM_IntensityHistogramRange', 'INTENSITY-HISTOGRAM_IntensityHistogramMeanAbsoluteDeviation', 'INTENSITY-HISTOGRAM_IntensityHistogramRobustMeanAbsoluteDeviation', 'INTENSITY-HISTOGRAM_IntensityHistogramMedianAbsoluteDeviation', 'INTENSITY-HISTOGRAM_IntensityHistogramCoefficientOfVariation', 'INTENSITY-HISTOGRAM_IntensityHistogramQuartileCoefficientOfDispersion’, 'INTENSITY-HISTOGRAM_IntensityHistogramEntropyLog10', 'INTENSITY-HISTOGRAM_IntensityHistogramEntropyLog2', 'INTENSITY-HISTOGRAM_AreaUnderCurveCIVH', 'INTENSITY-HISTOGRAM_Uniformity', 'INTENSITY-HISTOGRAM_RootMeanSquare', 'INTENSITY-HISTOGRAM_MaximumHistogramGradient', 'INTENSITY-HISTOGRAM_MaximumHistogramGradientGreyLevel', 'INTENSITY-HISTOGRAM_MinimumHistogramGradient', 'INTENSITY-HISTOGRAM_MinimumHistogramGradientGreyLevel', 'LOCAL_INTENSITY_HISTOGRAM_GlobalIntensityPeak', 'LOCAL_INTENSITY_HISTOGRAM_LocalIntensityPeak'** |
| --- | --- |

**Supplementary Table S2.** List of intensity radiomics features used in this study.


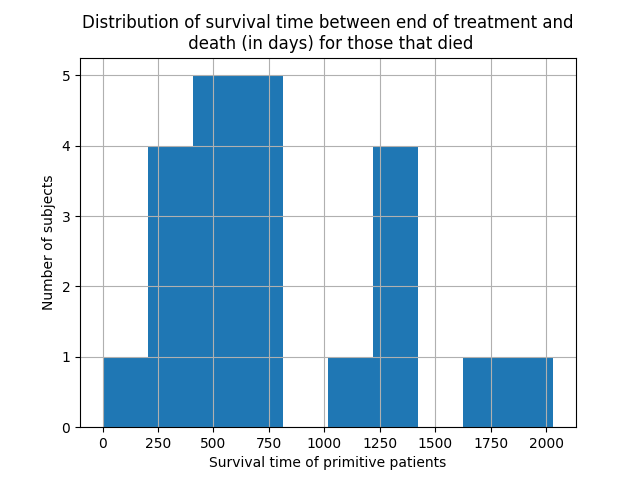

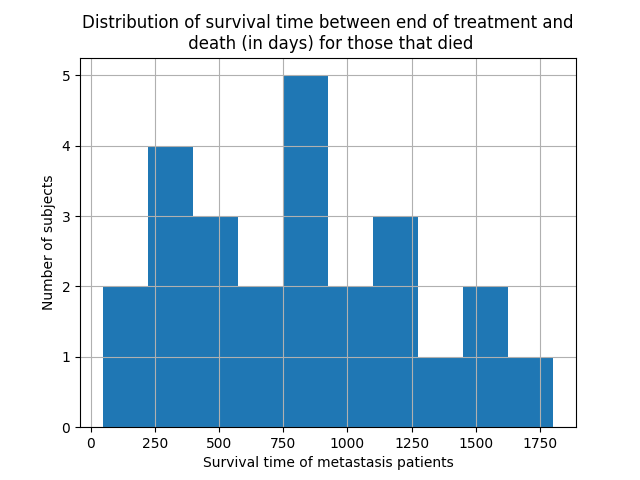


**Supplementary Figure S3.** Distribution of overall survival times in patients with primary (left) and secondary (right) lung tumors. The barplot illustrates the number of patients within specific survival intervals.

|  | **Values explored** |
| --- | --- |
| **colsample_bytree** | Real(0.001, 1) |
| **learning_rate** | Real(0.01, 0.5, prior='log-uniform') |
| **max_depth** | Integer(3, 10) |
| **min_child_weight** | Integer(1, 10) |
| **scale_pos_weight** | Integer(2, 8) |
| **subsample** | Real(0.5, 1) |

**Supplementary Table S4.** XGBoost hyperparameter values explored during Bayesian hyperparameter optimization. Real(X, Y) indicate that the parameter takes a real value between X an Y. Integer(Y, Z) indicate that the parameter takes an integer value between Y and Z.

|  | **Primitive tumor patients** | **Secondary tumor patients** |
| --- | --- | --- |
| **ROC AUC** | 0.89 ± 0.05 | 0.87 ± 0.10 |
| **Brier score** | 0.14 ± 0.07 | 0.19 ± 0.12 |
| **Precision** | 0.47 ± 0.10 | 0.66 ± 0.22 |
| **Recall** | 0.64 ± 0.21 | 1.00 ± 0.00 |
| **Accuracy** | 0.75 ± 0.08 | 0.72 ± 0.21 |
| **AUC-PR** | 0.73 ± 0.06 | 0.88 ± 0.10 |
| **F1 score** | 0.52 ± 0.06 | 0.78 ± 0.15 |

**Supplementary Table S5.** Model performances during nested cross-validation.
